# Supplementary material
Source: publisher figshare collection journal article supplement (https://frontiersin.figshare.com/ndownloader/files/23425889)

**Supplementary Figure 5.** Straw yield of finger millet and pigeon pea with AMF+PGPR and no inoculation.

Effect of no inoculation and combined application of AMF+PGPR on straw yields of finger millet (dark shaded bars) and pigeon pea (light shaded bars) in transplanted vs direct sown intercropping system at Bangalore and Kolli Hills during the season 2016-17. Significant differences among means were calculated for total yield of finger millet and pigeon pea. Each error bar indicates +1 standard deviation of the mean. Alpha ( $\alpha$ ) and beta ( $\beta$ ) above the bars indicate letters of significance for combined yields finger millet and pigeon pea. Bars not sharing the same letters are significantly different from each other at  $p < 0.05$ .

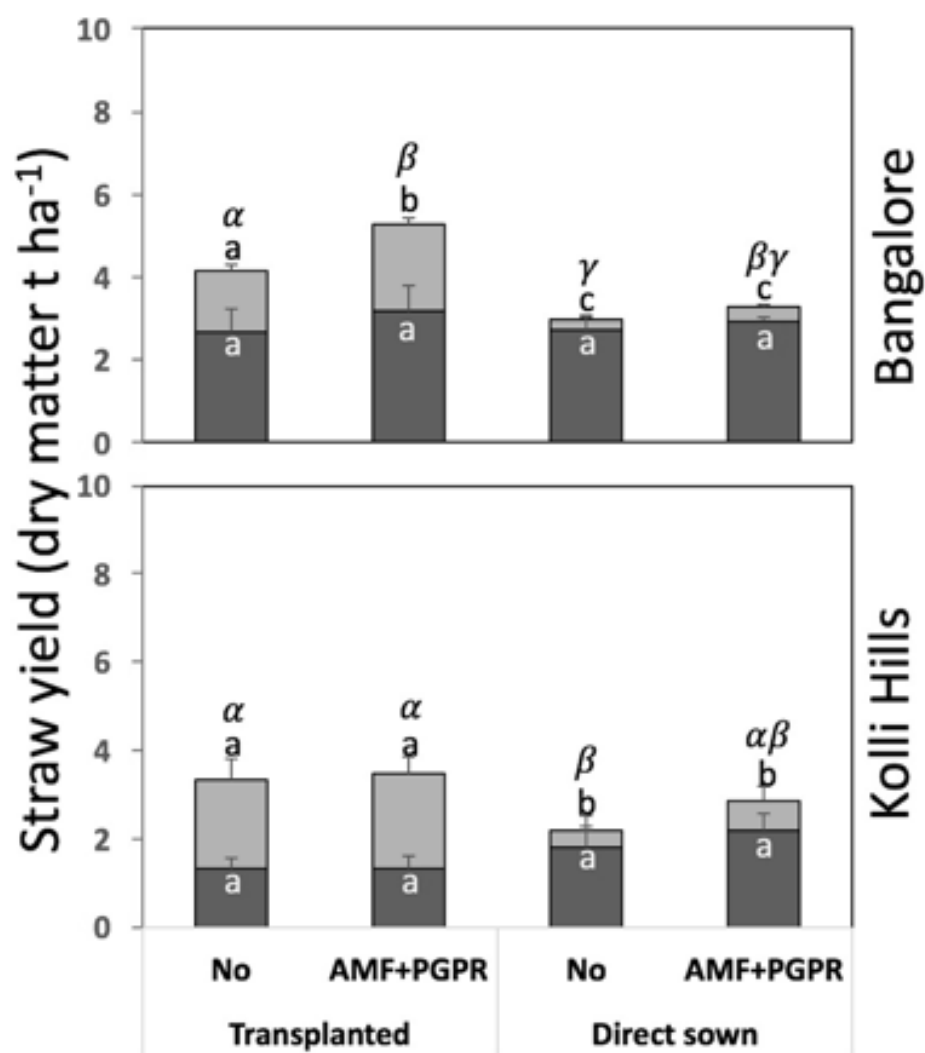

Supplement: Supplementary file 1 [file 23425889]
